# Supplementary material
Source: PubMed Central journal article supplement (PMC2836828)
Supplement: NIHMS166780-supplement-Supplement_Fig__1.pdf [file NIHMS166780-supplement-Supplement_Fig__1.pdf]

### Biodistribution in Tax<sup>+</sup> Mice at 1 h p.i.

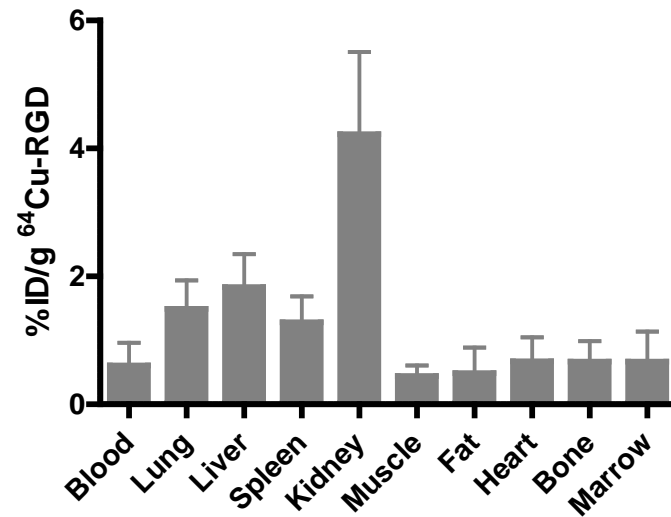

Supplementary Figure 1. Radiopharmaceutical retention in Tax<sup>+</sup> mouse tissues at 1 h p.i. Uptake in the kidney is high suggesting renal clearance as the main route of excretion.
