# Supplementary material
Source: PubMed Central journal article supplement (PMC2836828)
Supplement: NIHMS166780-supplement-Supplement_Fig__2.pdf [file NIHMS166780-supplement-Supplement_Fig__2.pdf]

### Liver Uptake in Tax<sup>+</sup> and WT Mice

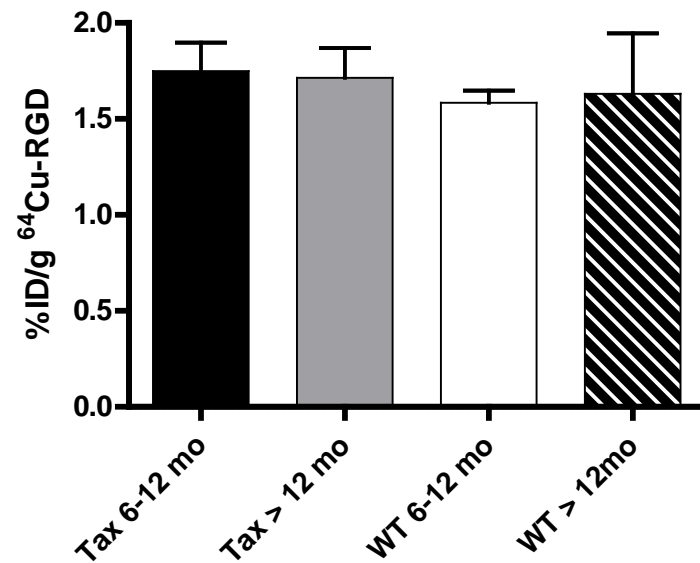

Supplementary Figure 2. Radiopharmaceutical retention is not significantly different in the liver tissue of Tax<sup>+</sup> and WT mice.
